# Supplementary material for: Zinc treatment reverses and anti-Zn-regulated miRs suppress esophageal carcinomas in vivo
Source: PubMed Central journal article supplement — Proc Natl Acad Sci U S A. 2023 May 8;120(20):e2220334120. doi: 10.1073/pnas.2220334120 (PMC10193985; doi:10.1073/pnas.2220334120), 2023-05-08
Supplement: pnas.2220334120.sapp.pdf [file pnas.2220334120.sapp.pdf]

## **Zinc treatment reverses and anti-Zn-regulated miRs suppress esophageal carcinomas in vivo**

Louise Y. Fong, Kay Huebner, Ruiyan Jing, Karl J. Smalley, Christopher R. Brydges, Oliver Fiehn, John L. Farber, and Carlo M. Croce

### **Correspondence authors:**

Louise Y. Fong and Carlo M. Croce

Email: [carlo.croce@osumc](mailto:carlo.croce@osumc) and [louisefong@me.com](mailto:louisefong@me.com)

### **This Pdf file includes:**

Figure S1 and S2

Table S1 and S2

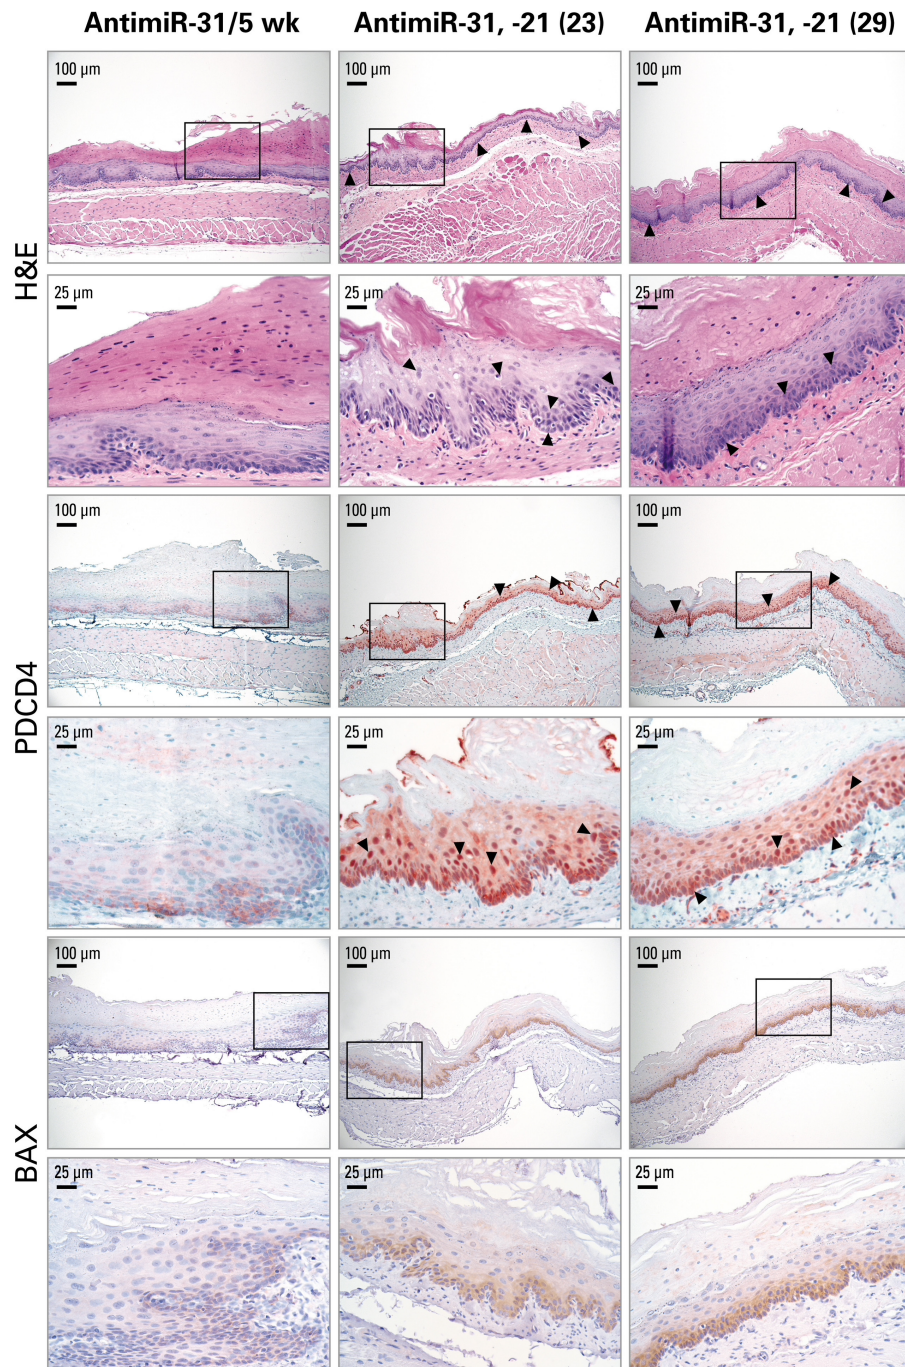

**Fig. S1.** Sequential delivery of antimiR-31 (5-wk) followed by antimiR-21 (15-wk) induces apoptosis in esophagus.

Representative photos of hematoxylin & eosin (H&E)-stained, antimiR-31, -21 rat esophageal epithelium (rat 23 & 29). Arrowheads indicate numerous suprabasal & basal cells undergoing apoptosis, shrunken apoptotic cells with condensed cytoplasm. PDCD4-IHC: near serial sections showing abundant cells that were undergoing apoptosis with intense nuclear overexpression of PDCD4 (tumor suppressor target of miR-21). BAX-IHC: near serial sections showing abundant cells that were undergoing apoptosis with strong cytoplasmic expression of BAX protein. Conversely, antimiR-31/5-wk rat esophageal epithelium showing lack of apoptosis (H&E-stained section) and absence of PDCD4 nuclear expression (PDCD4-IHC) and BAX protein expression (BAX-IHC).

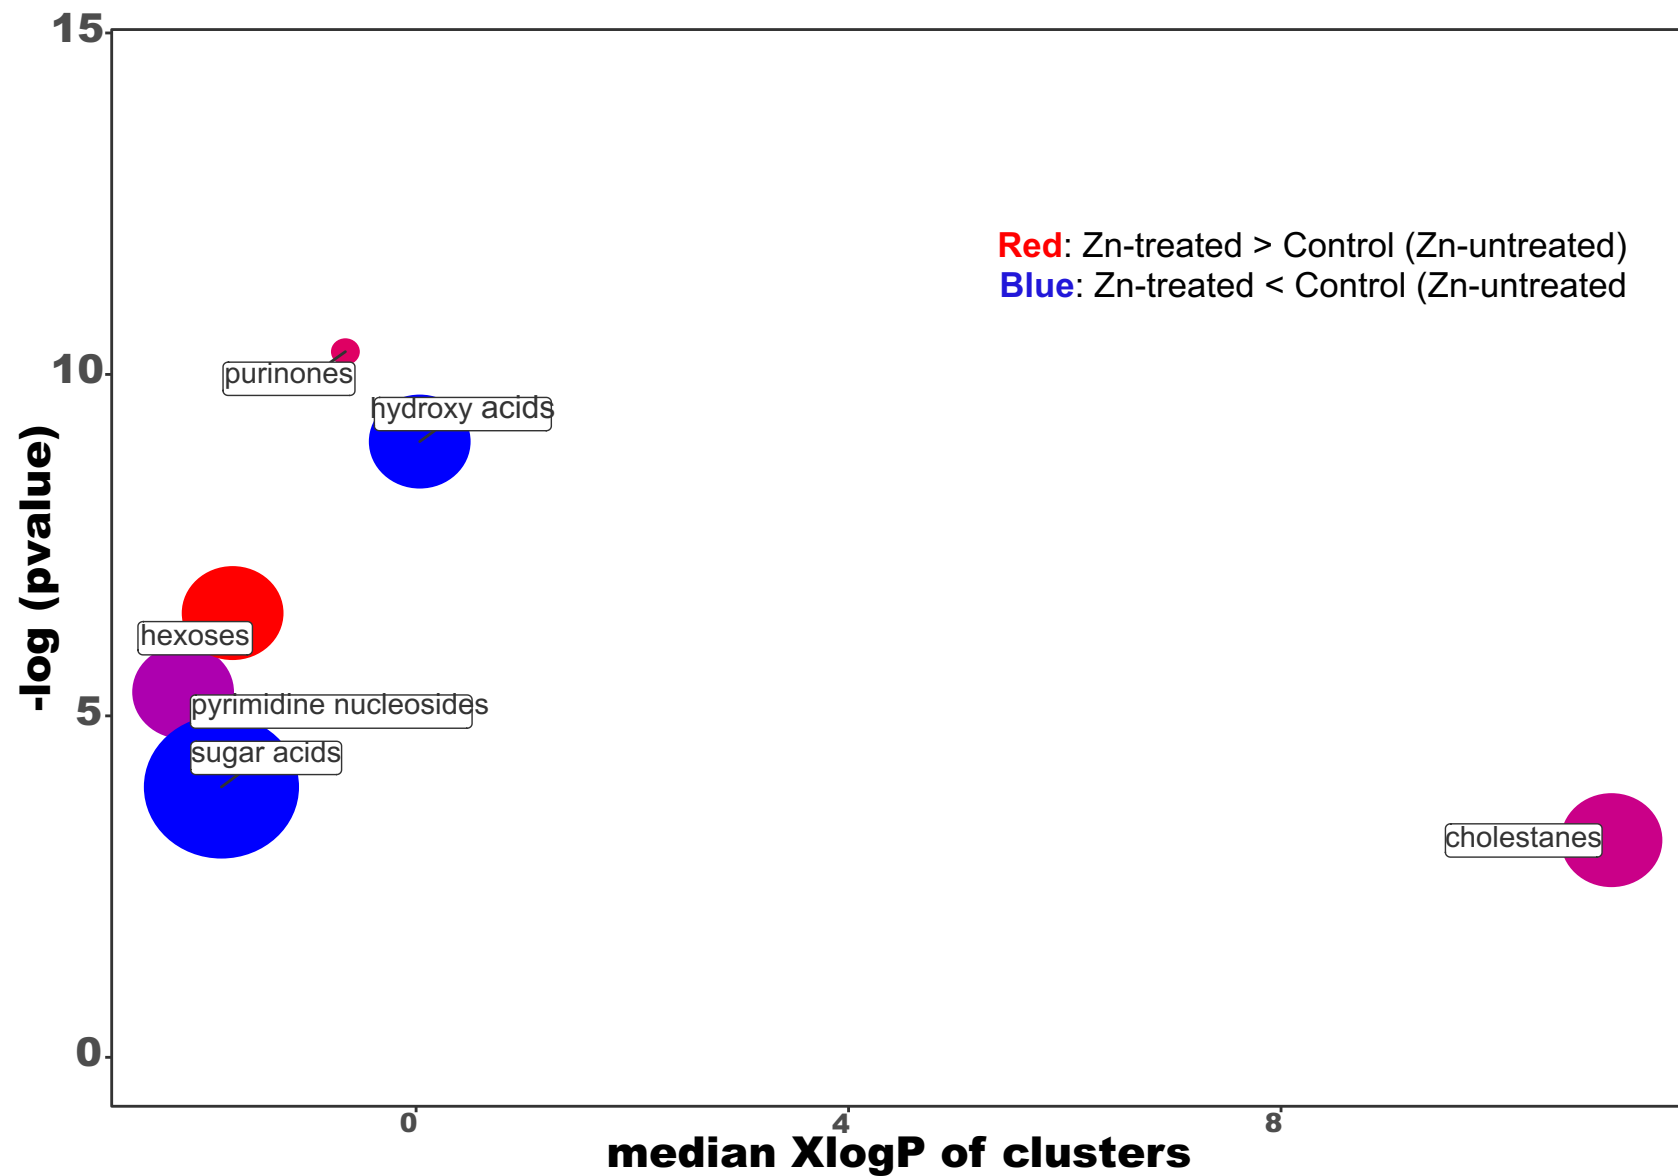

**Fig. S2.** ChemRICH set enrichment statistics plot on Zn-treated vs Zn untreated rat esophagus metabolites. Enrichment p-values are given by the Kolmogorov-Smirnov-test. The plot y-axis shows the most significantly altered clusters on the top. Node sizes represent the total number of metabolites in each cluster set. The node color scale shows the proportion of increased (**red**), decreased (**blue**) metabolites; purple nodes have both increased & decreased metabolites.

**Table S1.** Zn intervention reverses ESCC metabolome phenotype in Zn-treated versus Zn-untreated rats<sup>a</sup>

| Metabolite name               | InChI Key                    | Fold change (Zn-treated vs. Zn-untreated) | P-value | Biological process                                    |
|-------------------------------|------------------------------|-------------------------------------------|---------|-------------------------------------------------------|
| <b>24 down-regulated</b>      |                              |                                           |         |                                                       |
| Thymine                       | RWQNBRDOKXIBIVUHFFFAOYSA-N   | -5.43                                     | 0.01    | Pyrimidine metabolism                                 |
| <b>Putrescine</b>             | KIDHWZJUCRJVML-UHFFFAOYSA-N  | -3.96                                     | 0.02    | Polyamine biosynthesis                                |
| <b>3-Phenyllactic acid</b>    | VOXXWSYKYCBWHO-UHFFFAOYSA-N  | -3.86                                     | 0.01    | Phenylalanine metabolism                              |
| Indole-3-lactate              | XGILAAAMKEQUXLS-UHFFFAOYSA-N | -3.73                                     | 0.00    | Tryptophan metabolism                                 |
| <b>Glyceric acid</b>          | RBNPOMFGQQGHHO-UHFFFAOYSA-N  | -3.02                                     | 0.00    | Pentose phosphate pathway                             |
| Hexadecylglycerol             | OOWQBDFWEXAPB-UHFFFAOYSA-N   | -2.88                                     | 0.02    | ---                                                   |
| Alpha-ketoglutarate           | KPGXRSRHYNQIFN-UHFFFAOYSA-N  | -2.35                                     | 0.01    | Pentose phosphate pathway                             |
| p-Tolyl glucuronide           | JPAUCQAJHLSMQW-XPORZQOISA-N  | -2.30                                     | 0.01    | ---                                                   |
| <b>Phenylpyruvate</b>         | BTNMPGBKDVTSJY-UHFFFAOYSA-N  | -2.24                                     | 0.02    | Amino acid metabolism                                 |
| Pseudo-uridine                | PTJWIQPHWPFNBW-GBNDHIKLSA-N  | -2.22                                     | 0.00    | Pyrimidine metabolism                                 |
| Lanosterol                    | CAHGCLMLTWQZJN-BQNIITSRSA-N  | -2.09                                     | 0.03    | Steroid biosynthesis                                  |
| 2-Hydroxyglutaric acid        | HWXBTVNAVRSUOJR-UHFFFAOYSA-N | -2.01                                     | 0.01    | Butanoate metabolism                                  |
| Uric acid                     | LEHOTFFKMJEONL-UHFFFAOYSA-N  | -1.96                                     | 0.01    | Purine metabolism                                     |
| Succinic acid                 | KDYFGRWQOYBRFD-UHFFFAOYSA-N  | -1.87                                     | 0.01    | Citrate cycle (TCA cycle)                             |
| 2-Aminobutyric acid           | QWCKQJZIFLGMSD-UHFFFAOYSA-N  | -1.84                                     | 0.01    | ---                                                   |
| <b>Saccharic acid</b>         | DSLZVSRJTYRBFB-LLEIAEIESA-N  | -1.81                                     | 0.02    | Ascorbate & aldarate metabolism                       |
| Octadecylglycerol             | OGBUMNBNEWYMNJ-UHFFFAOYSA-N  | -1.77                                     | 0.04    | ---                                                   |
| Thymidine                     | IQFYKMKMVGJFEH-XLPZGREQSA-N  | -1.77                                     | 0.00    | Pyrimidine metabolism                                 |
| Xylonic acid isomer           | QXKAIJAYHKCRRRA-UHFFFAOYSA-N | -1.55                                     | 0.00    | ---                                                   |
| Glycerol-alpha-phosphate      | AWUCVROLDVIAJX-UHFFFAOYSA-N  | -1.51                                     | 0.02    | Glycerolipid metabolism (e.g. Plasmalogens)           |
| 2-Ketoisocaproic acid         | BKAJNAXTPSGJCU-UHFFFAOYSA-N  | -1.51                                     | 0.04    | Amino acid metabolism                                 |
| Threonic acid                 | JPIJQSOTBSSVTP-STHAYSLISA-N  | -1.48                                     | 0.04    | Ascorbate & aldarate metabolism                       |
| Oxoproline                    | ODHCTXKNWHXJC-VKHMVHEASA-N   | -1.16                                     | 0.02    | Glutathione metabolism                                |
| Pyruvic acid                  | LCTONWCANYUPML-UHFFFAOYSA-N  | -1.14                                     | 0.04    | Citrate cycle; glycine, serine & threonine metabolism |
| <b>14 up-regulated</b>        |                              |                                           |         |                                                       |
| Guanosine                     | NYHBQMYGNKIUIF-UUOKFMHZSA-N  | 3.58                                      | 0.00    | Purine metabolism                                     |
| <b>Glucose</b>                | WQZGKKKJIFFOK-VFUOTHLCSA-N   | 3.38                                      | 0.02    | Glycolysis/gluconeogenesis                            |
| <b>Isomaltose</b>             | DLRVLDZNNYCBX-RTPHMHGBSA-N   | 2.45                                      | 0.04    | Starch and sucrose metabolism                         |
| Inosine                       | UGQMRVRMYASKQ-KQYNXXCUSA-N   | 2.42                                      | 0.00    | Purine metabolism                                     |
| 5-Hydroxy-3-indoleacetic acid | DUUGKQCEGZLZNO-UHFFFAOYSA-N  | 2.35                                      | 0.04    | Tryptophan metabolism                                 |
| Uridine                       | DRTQHJPVMGBUFC-XVFCMESISA-N  | 2.19                                      | 0.01    | Pyrimidine metabolism                                 |
| Hypoxanthine                  | FDGQSTZJBFJUBT-UHFFFAOYSA-N  | 1.98                                      | 0.03    | Purine metabolism                                     |
| Ribonic acid                  | QXKAIJAYHKCRRRA-BXXZVTAOSA-N | 1.92                                      | 0.00    | ---                                                   |
| Xanthine                      | LRFVTYWOQMYALW-UHFFFAOYSA-N  | 1.77                                      | 0.02    | Purine metabolism                                     |
| <b>Fructose</b>               | RFSUNEUAIZKAJO-ARQDHWQXSA-N  | 1.70                                      | 0.01    | Starch & sucrose metabolism                           |
| <b>Myo-inositol</b>           | CDAISMWEOUEBRE-UHFFFAOYSA-N  | 1.58                                      | 0.02    | Galactose metabolism                                  |
| Tocopherol gamma-             | QUEDXNHFTDJVIY-DQCZWHMSA-N   | 1.50                                      | 0.02    | Ubiquinone/terpenoid-quinone biosynthesis             |
| Beta-sitosterol               | KZJWDPNRJALLNS-VJSFXXLFSA-N  | 1.49                                      | 0.00    | Steroid biosynthesis                                  |
| <b>Mannose</b>                | WQZGKKKJIFFOK-QTVWNMPRSA-N   | 1.29                                      | 0.04    | Fructose & mannose metabolism                         |

<sup>a</sup>ESCC (esophageal squamous cell carcinoma)-bearing Zn-deficient rats were given Zn treatment for 33 days (25 ppm Zn gluconate in drinking water) or untreated. Nontargeted metabolomic profiling (GC-TOF MS) on esophageal mucosa was performed at Zn-treatment endpoint ( $n = 10$  rats per group). A total of 39 significantly altered metabolites were identified (24 down- 14 up-regulated,  $P < 0.05$ ). In

particular, levels of hexoses (glucose, fructose, mannose) were increased, and levels of polyamine (putrescine), sugar acids, and hydroxy acids were decreased, thus pointing to a non-cancerous metabolome phenotype.

**Table S2, A.** ChemRICH statistical analysis on Zn-treated vs Zn-untreated rat esophagus metabolites

| Cluster name           | Cluster size | p-values       | FDR           | Key comp      | Altered me | Increased | Decreased | Increased r | Altered Ratio |
|------------------------|--------------|----------------|---------------|---------------|------------|-----------|-----------|-------------|---------------|
| purinones              | 3            | 0.000033       | 0.00094       | uric acid     | 3          | 2         | 1         | 0.7         | 1             |
| hydroxy acids          | 4            | <b>0.00012</b> | <b>0.0018</b> | 3-phenyllac   | <b>2</b>   | 0         | <b>2</b>  | 0           | 0.5           |
| hexoses                | 4            | <b>0.0015</b>  | <b>0.014</b>  | glucose       | <b>3</b>   | <b>3</b>  | 0         | 1           | 0.8           |
| pyrimidine nucleosides | 4            | 0.0048         | 0.034         | thymidine     | 3          | 1         | 2         | 0.3         | 0.8           |
| sugar acids            | 6            | <b>0.019</b>   | 0.11          | glyceric acid | <b>2</b>   | 0         | <b>2</b>  | 0           | 0.3           |
| cholestanes            | 4            | 0.042          | 0.2           | beta-sitoste  | 2          | 1         | 1         | 0.5         | 0.5           |

**Table S2, B.** ChemRICH analysis compounds\*

\*Compounds that are significantly (p value < 0.05) increased (red) or decreased (blue) are highlighted in their respective clusters.- Hexoses, sugar acids, hydroxy acids, and biogen

| Compound.Name            | InChiKeys    | Pubchem.ID | SMILES                                                                            | pvalue | foldchange | CID     | ClusterNum | xlogp  | ClusterLabel             | TreeLabels | FDR  |
|--------------------------|--------------|------------|-----------------------------------------------------------------------------------|--------|------------|---------|------------|--------|--------------------------|------------|------|
| pyruvic acid             | LCTONWCAN    | 1060       | CC(=O)C(=O)O                                                                      | 0.044  | 0.88       | 1060    | 50         | -0.426 | pyruvates                |            | 1    |
| citric acid              | KRKNYBCHX    | 311        | C(C(=O)O)C(C(=O)O)C(=O)O                                                          | 0.93   | 0.99       | 311     | 49         | -2.247 | citrates                 |            | 1    |
| succinic acid            | KDYFGRWQC    | 1110       | C(CC(=O)O)C(=O)O                                                                  | 0.014  | 0.54       | 1110    | 47         | -0.71  | dicarboxylic acids       |            | 1    |
| fumaric acid             | VZCYOOQTP    | 444972     | C=C/C(=O)O                                                                        | 0.98   | 0.99       | 444972  | 53         | -0.416 | dicarboxylic acids       |            | 1    |
| malic acid               | BJEPYKJPYRN  | 525        | C(C(C(=O)O)C(=O)O)C(=O)O                                                          | 0.53   | 0.9        | 525     | 1          | -1.474 | dicarboxylic acids       |            | 1    |
| xylulose                 | LQXVFWRQN    | 439205     | C1[C@@H]([C@@H](O)[C@H](O)[C@@H](O)CO)O                                           | 0.18   | 0.53       | 439205  | 25         | -1.497 | pentoses                 | a          | 1    |
| xylose                   | SRBFZHDQG    | 135191     | C1[C@H]([C@@H](O)[C@H](O)[C@@H](O)CO)O                                            | 0.15   | 0.75       | 135191  | 8          | -1.454 | pentoses                 |            | 1    |
| xylonic acid isomer      | QXKAIJAYHK   | 10264      | C(C(C(C(=O)O)C(=O)O)C(=O)O)C(=O)O                                                 | 0.0039 | 0.65       | 10264   | 19         | -3.067 | gum arabic               |            | 0.67 |
| xanthine                 | LRFVTYWQO    | 1188       | C1=NC2=C(N1)C(=O)N(C(=O)N2)C                                                      | 0.024  | 1.8        | 1188    | 11         | -0.654 | purinones                | b          | 1    |
| valine                   | KZSNJWFQE    | 6287       | CC(C)[C@@H](N)C(=O)O                                                              | 0.31   | 1.2        | 6287    | 13         | -2.169 | amino acids, branched-ch |            | 1    |
| uridine-5'-monophosphate | DJJCFXVJDGT  | 6030       | C1=CN(C(=O)NC1=O)COP(=O)([O-])[O-]                                                | 0.055  | 0.47       | 6030    | 12         | -3.775 | uracil nucleotides       |            | 1    |
| uridine                  | DRTQHQJPM    | 6029       | C1=CN(C(=O)NC1=O)N                                                                | 0.012  | 2.2        | 6029    | 12         | -2.117 | pyrimidine nucleosides   |            | 1    |
| uric acid                | LEHOTFFKMJ   | 1175       | C12=C(NC(=O)NC1=O)N(C)N2                                                          | 0.0089 | 0.51       | 1175    | 11         | -1.191 | purinones                | b          | 1    |
| urea                     | XSQUKJJFZC   | 1176       | C(=O)N(N)C(=O)O                                                                   | 0.92   | 1          | 1176    | 0          | -1.686 | organic chemicals        |            | 1    |
| uracil                   | ISAKRJDGNU   | 1174       | C1=CNC(=O)NC1=O                                                                   | 1      | 1          | 1174    | 28         | -0.875 | pyrimidinones            |            | 1    |
| UDP-N-acetylglucosamine  | LFTYTUAZOP   | 445675     | CC(=O)N[C@@H]1[C@@H](O[C@@H]2[C@H](O)[C@@H](CO)O[C@H]2O)C[C@H](O)[C@@H](O)[C@H]1O | 0.64   | 0.93       | 445675  | 42         | -5.903 | uridine diphosphate suga |            | 1    |
| UDP-glucuronic acid      | HDYANYHVC    | 17473      | C1=CN(C(=O)NC1=O)COP(=O)([O-])[O-]                                                | 0.31   | 0.76       | 17473   | 42         | -5.955 | uridine diphosphate suga |            | 1    |
| tyrosine                 | OUYCCASQ     | 6057       | C1=CC(=CC=C1)C(N)C(=O)O                                                           | 0.49   | 0.9        | 6057    | 31         | -2.711 | amino acids, aromatic    |            | 1    |
| tryptophan               | QIVBCDIJIAJF | 6305       | C1=CC=C2C(=C1)C(=CN2)C                                                            | 0.26   | 0.83       | 6305    | 15         | -2.023 | amino acids, aromatic    |            | 1    |
| trans-4-hydroxyproline   | PMMYEEVYN    | 5810       | C1[C@H](CN)C(=O)N[C@@H]1C(=O)O                                                    | 0.071  | 0.49       | 5810    | 16         | -0.786 | amino acids, cyclic      |            | 1    |
| tocopherol gamma-        | QUEDXNHFT    | 92729      | CC1=C(C=C2C=C(C=C(C=C2)O)O)O                                                      | 0.022  | 1.5        | 92729   | 52         | 10.514 | tocopherols              |            | 1    |
| tocopherol alpha-        | NCYCYXNIZ    | 638015     | CC1=C(C(CCC)C=C(C=C1)O)O                                                          | 0.92   | 0.99       | 638015  | 5          | 6.335  | retinoids                |            | 1    |
| thymine                  | RWQNBRODI    | 1135       | CC1=CNC(=O)NC1=O                                                                  | 0.011  | 0.18       | 1135    | 28         | -0.694 | pyrimidinones            |            | 1    |
| thymidine                | IQFYKMKVC    | 5789       | CC1=CN(C(=O)NC1=O)N                                                               | 0.001  | 0.57       | 5789    | 12         | -1.335 | pyrimidine nucleosides   |            | 0.18 |
| threonine                | AYFVYJQAPC   | 6288       | C[C@H]([C@@H](O)[C@H](O)CO)N                                                      | 0.47   | 1.1        | 6288    | 17         | -3.496 | amino acids              |            | 1    |
| threonic acid            | JPIJQSOTBSS  | 5460407    | C([C@@H]([C@@H](O)[C@H](O)CO)O)C(=O)O                                             | 0.044  | 0.68       | 5460407 | 1          | -2.395 | butyrates                |            | 1    |
| taurine                  | XOAAWQZAT    | 1123       | C(CS(=O)(=O)N)C(=O)O                                                              | 0.52   | 1.1        | 1123    | 35         | -1.678 | alkanesulfonic acids     |            | 1    |
| sulfuric acid            | QAOWNCQO     | 1118       | OS(=O)(=O)O                                                                       | 0.29   | 1.3        | 1118    | 14         | -1.764 | sulfuric acids           |            | 1    |
| sucrose                  | CZMRCDWA     | 5988       | C([C@@H]1[C@H]([C@@H]([C@H]([C@@H]1O)O)O)O)O                                      | 0.93   | 1          | 5988    | 40         | -3.277 | disaccharides            |            | 1    |
| stearic acid             | QIQXTHQIDY   | 5281       | CCCCCCCC                                                                          | 0.91   | 0.99       | 5281    | 2          | 8.708  | Saturated FA             |            | 1    |



|                        |                     |              |              |             |          |    |        |                            |   |      |
|------------------------|---------------------|--------------|--------------|-------------|----------|----|--------|----------------------------|---|------|
| squalene               | YYGNTYWPH 638072    | CC(=CCC/C(=  | 0.99         | 1           | 638072   | 5  | 11.482 | polyenes                   |   | 1    |
| spermidine             | ATHGHQPGF 1102      | C(CCNCCCN)I  | 0.65         | 1.1         | 1102     | 34 | -0.654 | putrescine                 |   | 1    |
| sorbitol               | FBPFZTCFMR 5780     | C([C@H])([C@ | 0.96         | 0.99        | 5780     | 7  | -3.896 | sugar alcohols             |   | 1    |
| sinigrin               | PHZOWSSBX 6911854   | C=CC/C(=N\C  | 0.54         | 0.91        | 6911854  | 4  | -1.84  | glucosinolates             | c | 1    |
| serine                 | MTCFGRXMJ 5951      | C([C@@H])(C  | 0.56         | 0.96        | 5951     | 17 | -3.956 | amino acids                |   | 1    |
| <b>*saccharic acid</b> | DSLZVSRJTYR 33037   | [C@H]([C@@   | <b>0.016</b> | <b>0.55</b> | 33037    | 10 | -3.582 | <b>sugar acids</b>         |   | 1    |
| ribulose-5-phosphate   | FNZLKVNUW 439184    | C([C@H])([C@ | 0.79         | 0.94        | 439184   | 10 | -4.396 | ribulosephosphates         |   | 1    |
| ribose-5-phosphate     | KTVPXOYAKL 439167   | C([C@@H]1[   | 0.064        | 1.4         | 439167   | 23 | -3.112 | hexosephosphates           |   | 1    |
| ribose                 | HMFHBZSHG 5779      | C([C@@H]1[   | 0.61         | 1.2         | 5779     | 25 | -1.454 | pentoses                   | a | 1    |
| ribonic acid           | QXKAIJAYHKI 5460677 | C([C@H])([C@ | 0.0032       | 1.9         | 5460677  | 19 | -3.067 | gum arabic                 |   | 0.55 |
| ribitol                | HEBKCHPVOI 827      | C(C(C(C(CO)C | 0.63         | 0.94        | 827      | 7  | -3.224 | sugar alcohols             |   | 1    |
| raffinose              | MUPFEKGTN 439242    | C([C@@H]1[   | 0.28         | 0.57        | 439242   | 4  | -4.814 | trisaccharides             | c | 1    |
| pyrophosphate          | XPPKVPWEQ 1023      | OP(=O)(O)OP  | 0.18         | 0.76        | 1023     | 14 | -3.476 | diphosphonates             |   | 1    |
| <b>*putrescine</b>     | KIDHWZJUCF 1045     | C(CCN)CN     | <b>0.022</b> | <b>0.25</b> | 1045     | 34 | -0.626 | <b>biogenic polyamines</b> |   | 1    |
| p-tolyl glucuronide    | JPAUCQAJHL 154035   | CC1=CC=C(C=C | 0.007        | 0.43        | 154035   | 52 | 0.189  | resols                     |   | 1    |
| pseudo-uridine         | PTJWIQPHW 15047     | C1=C(C(=O)N  | 0.0021       | 0.45        | 15047    | 12 | -2.477 | pyrimidine nucleosides     |   | 0.37 |
| proline                | ONIBWKKTO 145742    | C1C[C@H](N   | 0.58         | 1.1         | 145742   | 16 | -0.185 | amino acids, cyclic        |   | 1    |
| pimelic acid           | WLJVNTCWH 385       | C(CCC(=O)O)  | 0.27         | 0.42        | 385      | 26 | 0.575  | dicarboxylic acids         |   | 1    |
| phytosphingosine       | AERBNYCJB 122121    | CCCCCCCCC    | 0.16         | 0.76        | 122121   | 51 | 5.027  |                            |   | 1    |
| phosphogluconic acid   | BIRSGZKFKXL 91493   | C([C@H])([C@ | 0.3          | 1.2         | 91493    | 10 | -4.968 | gluconates                 |   | 1    |
| phosphoethanolamine    | SUHOOTKUP 1015      | C(COP(=O)(O  | 0.47         | 0.9         | 1015     | 35 | -2.504 | amino alcohols             |   | 1    |
| phosphoenolpyruvate    | DTBNBXWJW 58114173  | C=C(C(=O)O)I | 0.075        | 1.4         | 58114173 | 53 | -1.296 | hydroxy acids              |   | 1    |
| phosphate              | NBIIXVUZAF 1004     | OP(=O)(O)O   | 0.9          | 0.98        | 1004     | 14 | -2.247 | polymers                   |   | 1    |
| <b>*phenylpyruvate</b> | BTNMPGBKD           | C1=CC=C(C=C  | <b>0.019</b> | <b>0.45</b> | cid_54   | 43 | 0.907  | <b>hydroxy acids</b>       |   | 1    |
| phenylalanine          | COLNVLHVI 6140      | C1=CC=C(C=C  | 0.3          | 0.83        | 6140     | 31 | -1.575 | amino acids, aromatic      |   | 1    |
| pelargonic acid        | FBUKVWPVB 8158      | CCCCCCCCC(   | 0.57         | 0.9         | 8158     | 2  | 3.587  | Saturated FA               |   | 1    |
| parabanic acid         | FZLIKDUSUDI 67126   | C1(=O)C(=O)I | 0.55         | 1.1         | 67126    | 18 | -0.58  | hydantoin                  |   | 1    |
| pantothenic acid       | GHOKWGTU; 6613      | CC(C)(CO)[C@ | 0.65         | 0.93        | 6613     | 54 | -1.343 | beta-alanine               |   | 1    |
| palmitoleic acid       | SECPZKHBEN 445638   | CCCCC/C=C    | 0.14         | 0.73        | 445638   | 3  | 7.054  | UnSaturated FA             |   | 1    |
| palmitic acid          | IPCSVZSSVZV 985     | CCCCCCCCC    | 0.69         | 0.97        | 985      | 2  | 7.57   | Saturated FA               |   | 1    |
| oxoproline             | ODHCTXKNV 7405      | C1CC(=O)N[C  | 0.018        | 0.86        | 7405     | 16 | -0.827 | amino acids, cyclic        |   | 1    |
| ornithine              | AHLPHDHHV 6262      | C(C[C@@H])(  | 0.66         | 0.93        | 6262     | 29 | -3.307 | amino acids, basic         |   | 1    |
| O-phosphoserine        | BZQFBWGGL 57689797  | C([C@@H])(C  | 0.7          | 1           | 57689797 | 17 | -5.185 | plasmalogens               |   | 1    |
| oleic acid             | ZQPPMHVWI 445639    | CCCCCCC/C    | 0.53         | 0.87        | 445639   | 3  | 8.192  | UnSaturated FA             |   | 1    |
| octadecylglycerol      | OGBUMNBN 3681       | CCCCCCCCC    | 0.038        | 0.56        | 3681     | 20 | 7.955  | glyceryl ethers            | d | 1    |
| noradrenaline          | SFLSHLXELF 439260   | C1=CC(=C(C=  | 0.5          | 1.7         | 439260   | 31 | -0.714 | catecholamines             |   | 1    |
| nicotinic acid         | PVNIIMVLHY 938      | C1=CC(=CN=I  | 0.39         | 1.3         | 938      | 46 | -0.508 | nicotinic acids            |   | 1    |
| nicotinamide           | DFPAKSUCGF 936      | C1=CC(=CN=I  | 0.37         | 1.2         | 936      | 46 | -1.236 | nicotinic acids            |   | 1    |
| N-acetylmannosamine    | OVNRDRQMI 439281    | CC(=O)N[C@   | 0.12         | 1.3         | 439281   | 54 | -1.488 | hexosamines                |   | 1    |
| N-acetylaspartic acid  | OTCCIMWXF 65065     | CC(=O)N[C@   | 0.14         | 0.47        | 65065    | 32 | -1.265 | amino acids, acidic        |   | 1    |
| myristic acid          | TUNFSRHWC 11005     | CCCCCCCCC    | 0.8          | 0.97        | 11005    | 2  | 6.432  | Saturated FA               |   | 1    |
| myo-inositol           | CDAISMWEC 892       | C1(C(C(C(C(C | 0.018        | 1.6         | 892      | 30 | -1.458 | sugar alcohols             |   | 1    |
| methionine sulfoxide   | QEFRNWWL; 158980    | CS(=O)CC[C@  | 0.54         | 0.93        | 158980   | 27 | -3.882 | amino acids, sulfur        |   | 1    |
| methionine             | FFEARJCKVFF 6137    | CSCC[C@@H    | 0.43         | 1.1         | 6137     | 27 | -1.853 | amino acids, sulfur        |   | 1    |
| methanolphosphate      | CAAULPUQFI 13130    | COP(=O)(O)C  | 0.81         | 1           | 13130    | 14 | -1.728 | organophosphates           |   | 1    |

|                          |                    |              |        |      |          |    |        |                          |   |      |
|--------------------------|--------------------|--------------|--------|------|----------|----|--------|--------------------------|---|------|
| <b>*mannose</b>          | WQZGKKKJJI 18950   | C([C@@H]1[   | 0.044  | 1.3  | 18950    | 8  | -1.697 | <b>hexoses</b>           |   | 1    |
| maltotriose              | FGDTMLNYI 439586   | C([C@@H]1[   | 0.36   | 0.58 | 439586   | 4  | -5.629 | trisaccharides           | c | 1    |
| maltose                  | GUBGYTABK 439186   | C([C@@H]1[   | 0.79   | 0.93 | 439186   | 4  | -3.663 | disaccharides            | c | 1    |
| maleimide                | PEHTFAAVS 10935    | C1=CC(=O)N   | 0.9    | 1    | 10935    | 18 | -0.676 | maleimides               |   | 1    |
| lyxitol                  | HEBKCHPVOI 439255  | C([C@@H](C   | 0.28   | 1.3  | 439255   | 7  | -3.224 | sugar alcohols           |   | 1    |
| lysine                   | KDXKERNBSI 5962    | C(CCN)C[C@   | 0.49   | 0.85 | 5962     | 44 | -2.949 | amino acids, basic       |   | 1    |
| linoleic acid            | OYHQOLUKZ 5280450  | CCCCC/C=C\   | 0.91   | 0.97 | 5280450  | 3  | 7.865  | UnSaturated FA           |   | 1    |
| leucine                  | ROHFNLRQFI 6106    | CC(C)C[C@@   | 0.68   | 0.94 | 6106     | 38 | -1.389 | amino acids, branched-ch |   | 1    |
| lauric acid              | POULHZVOKI 3893    | CCCCCCCCC    | 0.86   | 1    | 3893     | 2  | 5.294  | Saturated FA             |   | 1    |
| lanosterol               | CAHGCLMLT 246983   | C[C@H](CCC   | 0.034  | 0.48 | 246983   | 5  | 10.21  | cholestanes              |   | 1    |
| lactic acid              | JVTAAEKZFI 612     | CC(C(=O)O)O  | 0.1    | 0.72 | 612      | 41 | -0.591 | hydroxy acids            |   | 1    |
| isothreonine acid        | JPIJQSOTBSS 151152 | C([C@H]([C@  | 0.18   | 0.8  | 151152   | 1  | -2.395 | butyrates                |   | 1    |
| isomaltose               | DLRVVLDZNN 439193  | C([C@@H]1[   | 0.038  | 2.4  | 439193   | 4  | -3.234 | disaccharides            | c | 1    |
| isoleucine               | AGPKZVBTJJ 6306    | CC[C@H](C)[  | 0.49   | 0.9  | 6306     | 38 | -1.6   | amino acids, branched-ch |   | 1    |
| inositol-4-monophosphate | INAPMGXU 440043    | [C@H]1([C@   | 0.73   | 1.1  | 440043   | 30 | -3.545 | inositol phosphates      |   | 1    |
| inosine 5'-monophosphate | GRSZFWQUA 8582     | C1=NC2=C(CI  | 0.1    | 0.29 | 8582     | 9  | -3.605 | purine nucleosides       |   | 1    |
| inosine                  | UGQMRVRM 6021      | C1=NC2=C(CI  | 0.0042 | 2.4  | 6021     | 9  | -1.947 | purine nucleosides       |   | 0.71 |
| indole-3-lactate         | XGILAAAMKEC 92904  | C1=CC=C2C(=  | 0.004  | 0.27 | 92904    | 15 | 0.21   | amino acids, aromatic    |   | 0.68 |
| hypoxanthine             | FDGQSTZJBF 790     | C1=NC2=C(N   | 0.032  | 2    | 790      | 11 | 0.556  | purinones                | b | 1    |
| histidine                | HNDVDQJCI 6274     | C1=C(NC=N1   | 0.88   | 0.96 | 6274     | 9  | -3.429 | amino acids, cyclic      |   | 1    |
| hexadecylglycerol        | OOWQBDFW 72733     | CCCCCCCCC    | 0.017  | 0.35 | 72733    | 20 | 6.817  | glyceryl ethers          | d | 1    |
| heptadecanoic acid       | KEMQGTRYU 10465    | CCCCCCCCC    | 0.66   | 0.96 | 10465    | 2  | 8.139  | Saturated FA             |   | 1    |
| guanosine                | NYHBQMYG 6802      | C1=NC2=C(N   | 0.0022 | 3.6  | 6802     | 9  | -2.272 | purine nucleosides       |   | 0.38 |
| glycine                  | DHMQDGOQ 750       | C(C(=O)O)N   | 0.46   | 1.1  | 750      | 33 | -3.35  | amino acids              |   | 1    |
| glycerol-alpha-phosphate | AWUCVROL 754       | C(C(COP(=O)  | 0.016  | 0.66 | 754      | 21 | -3.109 | glycerophosphates        |   | 1    |
| glycerol                 | PEDCQBHIV 753      | C(C(CO)O)O   | 0.65   | 1    | 753      | 45 | -1.788 | sugar alcohols           |   | 1    |
| <b>*glyceric acid</b>    | RBNPOMFGC 752      | C(C(C(=O)O)C | 0.0043 | 0.33 | 752      | 1  | -1.723 | <b>sugar acids</b>       |   | 0.72 |
| glutathione              | RWSXRVCMC 124886   | C(CC(=O)N)C  | 0.12   | 1.5  | 124886   | 48 | -4.23  | oligopeptides            |   | 1    |
| glutamine                | ZDXPYRJPND 5961    | C(CC(=O)N)[C | 0.92   | 1    | 5961     | 29 | -4.077 | amino acids, basic       |   | 1    |
| glutamic acid            | WHUUTDBJX 33032    | C(CC(=O)O)[C | 0.081  | 0.8  | 33032    | 29 | -3.349 | amino acids, acidic      |   | 1    |
| glucuronic acid          | AEMOLEFTQ 94715    | [C@H]1([C    | 0.47   | 0.89 | 94715    | 6  | -1.54  | glucuronates             |   | 1    |
| glucose-6-phosphate      | NBSCHQHZL 5958     | C([C@@H]1[   | 0.17   | 0.19 | 5958     | 22 | -3.355 | hexosephosphates         | e | 1    |
| glucose-1-phosphate      | HXXFSFRBO 65533    | C([C@@H]1[   | 0.4    | 0.83 | 65533    | 22 | -3.355 | hexosephosphates         | e | 1    |
| <b>*glucose</b>          | WQZGKKKJJI 64689   | C([C@@H]1[   | 0.019  | 3.4  | 64689    | 8  | -1.697 | <b>hexoses</b>           |   | 1    |
| gluconic acid lactone    | PHOQVHQST 7027     | C([C@@H]1[   | 0.087  | 0.47 | 7027     | 6  | -1.203 | gluconates               |   | 1    |
| gluconic acid            | RGHNJXZEO 6857417  | C([C@@H]([C  | 0.082  | 0.34 | 6857417  | 10 | -3.739 | gluconates               |   | 1    |
| gamma-aminobutyric acid  | BTCSSZJGUN 119     | C(CC(=O)O)C  | 0.46   | 1.1  | 119      | 33 | -0.668 | aminobutyrate            |   | 1    |
| galacturonic acid        | AEMOLEFTQ 441476   | [C@H]1([C    | 0.4    | 1.2  | 441476   | 6  | -1.54  | hexuronic acids          |   | 1    |
| galactose-6-phosphate    | NBSCHQHZL 439404   | C([C@@H]1[   | 0.25   | 0.35 | 439404   | 22 | -3.355 | hexosephosphates         | e | 1    |
| galactinol               | VCWMRQDB 11727586  | C([C@@H]1[   | 0.41   | 2    | 11727586 | 4  | -3.424 | disaccharides            | c | 1    |
| fucose                   | SHZGCJCMOI 439650  | C[C@@H]1[C   | 0.2    | 1.3  | 439650   | 8  | -0.994 | hexoses                  |   | 1    |
| fructose-6-phosphate     | BGWGXPA 440641     | C([C@@H]1[   | 0.15   | 0.22 | 440641   | 23 | -3.398 | hexosephosphates         |   | 1    |
| fructose-1-phosphate     | RHKKBWRN 439394    | C([C@@H]1[   | 0.2    | 1.2  | 439394   | 23 | -3.398 | hexosephosphates         |   | 1    |
| <b>*fructose</b>         | RFSUNEUAIZ 439709  | C([C@@H]1[   | 0.011  | 1.7  | 439709   | 25 | -1.74  | <b>hexoses</b>           | a | 1    |
| ethanolamine             | HZAXFHJVJLS 700    | C(CO)N       | 0.77   | 0.96 | 700      | 35 | -1.275 | amino alcohols           |   | 1    |





|                            |                   |                                         |       |              |    |                           |   |
|----------------------------|-------------------|-----------------------------------------|-------|--------------|----|---------------------------|---|
| 3,6-anhydro-D-galactose    | WZYRMLAW 16069996 | C1[C@H]([C@H]1O)O                       | 0.73  | 1.1 16069996 | 6  | -1.449 methylgalactosides | 1 |
| 2-monoolein                | UPWGQKDV 5319879  | CCCCCCCC/C                              | 0.46  | 0.77 5319879 | 36 | 7.132 glycerides          | 1 |
| 2-ketoisocaproic acid      | BKAJNAXTPS 70     | CC(C)CC(=O)O                            | 0.041 | 0.66 70      | 50 | 0.904 keto acids          | 1 |
| 2-hydroxyglutaric acid     | HWXBTNAVF 43      | C(CC(=O)O)C                             | 0.012 | 0.5 43       | 19 | -1.116 dicarboxylic acids | 1 |
| 2-hydroxybutanoic acid     | AFENDNXGA 440864  | CC[C@H](C(=O)O)O                        | 0.37  | 1.2 440864   | 41 | -0.233 hydroxybutyrates   | 1 |
| 2-aminobutyric acid        | QWCKQJZIFL 6657   | CCC(C(=O)O)N                            | 0.014 | 0.54 6657    | 13 | -2.466 aminobutyrate      | 1 |
| 2,3-dihydroxybutanoic acid | LOUGYXZSUF 250402 | CC(C(C(=O)O)O)O                         | 0.13  | 0.81 250402  | 1  | -1.263 sugar acids        | 1 |
| 1-monostearin              | VBICKXHEKH 24699  | CCCCCCCCC                               | 0.34  | 0.88 24699   | 37 | 7.648 glycerides          | 1 |
| 1-monopalmitin             | QHZLMUACJ 14900   | CCCCCCCCC                               | 0.095 | 0.74 14900   | 37 | 6.51 glycerides           | 1 |
| 1-monoolein                | RZRNAYUHW 5283468 | CCCCCCCC/C                              | 0.19  | 0.45 5283468 | 36 | 7.132 glycerides          | 1 |
| 1-kestose                  | VAWYEUIPHI 440080 | C([C@@H]1[C@H]([C@@H]([C@H](O1)CO)O)O)O | 0.35  | 0.58 440080  | 40 | -4.857 trisaccharides     | 1 |
